# Supplementary material for: Plantar support adaptations in healthy subjects after eight weeks of barefoot running training
Source: PeerJ. 2020 Mar 31;8:e8862. doi: 10.7717/peerj.8862 (PMC7120041; doi:10.7717/peerj.8862)
Supplement: Supplemental Information 1 [file peerj-08-8862-s001.xlsx]

## Sheet: DINÁMICA
											DURATION OF STANCE (ms)									MOMENT IN WHICH THE FLATFOOT PHASE OCCURS (ms)									% MOMENT IN WHICH THE FLATFOOT PHASE OCCURS RESPECT DURATION OF STANCE (%)									TOTAL FOOT CONTACT (DE COCK, 2005) O MAXIMUM SURFACE OF THE STANCE (cm2)									MAXIMUM SURFACE OF THE FLAT FOOT PHASE (cm2)
								FOOT STRIKE PATTERN DOMINANT FOOT			BASELINE			POST 20 MIN RUN			POST 8 WEEK TRAINING			BASELINE			POST 20 MIN RUN			POST 8 WEEK TRAINING			BASELINE			POST 20 MIN RUN			POST 8 WEEK TRAINING			BASELINE			POST 20 MIN RUN			POST 8 WEEK TRAINING			BASELINE
N°	SEX	AGE	WEIGHT	HEIGHT	BMI	DOMINANT FOOT	GROUP	BASELINE	POST20	POST8W	Dominant Foot	Non Dominant Foot	Symmetry Index	Dominant Foot	Non Dominant Foot	Symmetry Index	Dominant Foot	Non Dominant Foot	Symmetry Index	DF	NDF	SI	DF	NDF	SI	DF	NDF	SI	Dominant Foot	Non Dominant Foot	Symmetry Index	Dominant Foot	Non Dominant Foot	Symmetry Index	Dominant Foot	Non Dominant Foot	Symmetry Index	Dominant Foot	Non Dominant Foot	Symmetry Index	Dominant Foot	Non Dominant Foot	Symmetry Index	Dominant Foot	Non Dominant Foot	Symmetry Index	Dominant Foot	Non Dominant Foot	Symmetry Index
1	1	21	69.5	1.79	21.691	1	BFRGr	R	M	R	200	200	0	200	217	-8.15348	283	267	5.81818	83	83	0	83	83	0	117	117	0	41.5	41.5	0	41.5	38.2488	8.15348	41.3428	43.8202	-5.81818	70	85	-19.3548	96	120	-22.2222	137	138	-0.727273	52	62	-17.5439
2	1	20	66.6	1.68	23.5969	1	BFRGr	A	A	R	150	150	0	117	133	-12.8	233	217	7.11111	83	83	0	67	50	29.0598	83	67	21.3333	55.3333	55.3333	0	57.265	37.594	41.4742	35.6223	30.8756	14.2764	53	61	-14.0351	69	56	20.8	136	118	14.1732	47	54	-13.8614
3	1	23	86	1.69	30.111	1	BFRGr	M	A	R	183	150	19.8198	183	150	19.8198	250	233	7.03934	67	83	-21.3333	83	67	21.3333	100	100	0	36.612	55.3333	-40.7227	45.3552	44.6667	1.52968	40	42.9185	-7.03934	95	65	37.5	74	76	-2.66667	137	144	-4.98221	74	55	29.4574
4	1	18	60.6	1.68	21.4711	1	BFRGr	A	A	R	117	117	0	100	117	-15.6682	167	200	-17.9837	67	50	29.0598	50	67	-29.0598	83	83	0	57.265	42.735	29.0598	50	57.265	-13.5458	49.7006	41.5	17.9837	44	44	0	41	57	-32.6531	109	123	-12.069	39	34	13.6986
5	1	19	66.8	1.67	23.9521	1	BFRGr	M	M	A	117	133	-12.8	117	100	15.6682	183	167	9.14286	33	50	-40.9639	50	33	40.9639	83	50	49.6241	28.2051	37.594	-28.5379	42.735	33	25.7082	45.3552	29.9401	40.9456	64	58	9.83607	60	58	3.38983	91	96	-5.34759	45	48	-6.45161
6	1	18	56.4	1.65	20.7163	1	BFRGr	R	R	R	233	250	-7.03934	200	233	-15.2425	250	233	7.03934	117	117	0	100	100	0	117	133	-12.8	50.2146	46.8	7.03934	50	42.9185	15.2425	46.8	57.0815	-19.7947	96	109	-12.6829	102	106	-3.84615	118	122	-3.33333	63	70	-10.5263
7	1	19	73.2	1.76	23.6312	2	BFRGr	R	R	R	200	200	0	183	200	-8.87728	217	200	8.15348	100	117	-15.6682	100	100	0	117	100	15.6682	50	58.5	-15.6682	54.6448	50	8.87728	53.9171	50	7.5388	115	124	-7.53138	132	111	17.284	135	133	1.49254	59	81	-31.4286
8	1	19	68.6	1.72	23.1882	1	BFRGr	R	R	A	167	167	0	200	200	0	217	167	26.0417	83	100	-18.5792	100	100	0	83	67	21.3333	49.7006	59.8802	-18.5792	50	50	0	38.2488	40.1198	-4.77465	75	87	-14.8148	102	110	-7.54717	93	96	-3.1746	51	56	-9.34579
9	2	21	52.4	1.59	20.727	1	BFRGr	A	A	A	150	167	-10.7256	150	167	-10.7256	200	217	-8.15348	67	83	-21.3333	67	83	-21.3333	117	117	0	44.6667	49.7006	-10.6688	44.6667	49.7006	-10.6688	58.5	53.9171	8.15348	50	49	2.0202	51	51	0	96	77	21.9653	44	44	0
10	1	18	72.2	1.78	22.7875	2	BFRGr	A	R	R	150	183	-19.8198	183	183	0	200	167	17.9837	83	117	-34	83	83	0	67	67	0	55.3333	63.9344	-14.4232	45.3552	45.3552	0	33.5	40.1198	-17.9837	71	78	-9.39597	89	96	-7.56757	117	118	-0.851064	62	57	8.40336
11	1	18	77.6	1.73	25.928	1	BFRGr	A	R	R	150	150	0	200	183	8.87728	200	217	-8.15348	50	50	0	133	100	28.3262	83	117	-34	33.3333	33.3333	0	66.5	54.6448	19.5719	41.5	53.9171	-26.0269	73	69	5.6338	119	110	7.86026	120	154	-24.8175	55	53	3.7037
12	1	19	89.2	1.9	24.7091	2	BFRGr	A	A	A	183	200	-8.87728	167	167	0	200	217	-8.15348	67	67	0	67	67	0	100	100	0	36.612	33.5	8.87728	40.1198	40.1198	0	50	46.0829	8.15348	81	81	0	99	76	26.2857	109	98	10.628	71	70	1.41844
13	2	19	62.7	1.6	24.4922	1	BFRGr	R	R	R	233	183	24.0385	217	200	8.15348	317	250	23.6332	133	133	0	117	117	0	133	117	12.8	57.0815	72.6776	-24.0385	53.9171	58.5	-8.15348	41.9558	46.8	-10.9157	84	73	14.0127	87	91	-4.49438	116	118	-1.7094	51	41	21.7391
14	1	20	61.7	1.7	21.3495	1	BFRGr	M	M	A	133	150	-12.0141	100	117	-15.6682	167	200	-17.9837	50	67	-29.0598	50	67	-29.0598	50	67	-29.0598	37.594	44.6667	-17.1958	50	57.265	-13.5458	29.9401	33.5	-11.2228	75	75	0	64	62	3.1746	86	99	-14.0541	62	61	1.62602
15	1	20	68.3	1.77	21.8009	2	BFRGr	A	M	A	150	167	-10.7256	117	200	-52.3659	217	250	-14.1328	67	83	-21.3333	50	100	-66.6667	83	83	0	44.6667	49.7006	-10.6688	42.735	50	-15.6682	38.2488	33.2	14.1328	56	60	-6.89655	89	65	31.1688	72	95	-27.5449	52	54	-3.77358
16	2	21	59	1.6	23.0469	1	BFRGr	R	M	R	167	200	-17.9837	133	183	-31.6456	233	233	0	117	100	15.6682	50	100	-66.6667	100	83	18.5792	70.0599	50	33.4165	37.594	54.6448	-36.971	42.9185	35.6223	18.5792	76	80	-5.12821	67	75	-11.2676	114	99	14.0845	50	51	-1.9802
1	1	23	65.4	1.69	22.8984	1	SHGr	A	A	A	167	150	10.7256	150	150	0	200	167	17.9837	83	83	0	83	83	0	100	100	0	49.7006	55.3333	-10.7256	55.3333	55.3333	0	50	59.8802	-17.9837	56	62	-10.1695	59	63	-6.55738	61	78	-24.4604	52	58	-10.9091
2	1	20	82.3	1.75	26.8735	1	SHGr	R	R	R	167	167	0	150	167	-10.7256	200	200	0	100	100	0	100	100	0	67	67	0	59.8802	59.8802	0	66.6667	59.8802	10.7256	33.5	33.5	0	82	91	-10.4046	79	107	-30.1075	136	140	-2.89855	57	55	3.57143
3	2	20	65.1	1.6	25.43	1	SHGr	A	A	A	183	167	9.14286	200	200	0	267	250	6.5764	100	100	0	100	117	-15.6682	117	117	0	54.6448	59.8802	-9.14286	50	58.5	-15.6682	43.8202	46.8	-6.5764	61	57	6.77966	68	71	-4.31655	73	83	-12.8205	55	53	3.7037
4	1	19	66.8	1.71	22.8446	1	SHGr	R	R	R	250	233	7.03934	233	217	7.11111	233	217	7.11111	117	117	0	100	100	0	100	100	0	46.8	50.2146	-7.03934	42.9185	46.0829	-7.11111	42.9185	46.0829	-7.11111	107	106	0.938967	110	102	7.54717	126	112	11.7647	77	72	6.71141
5	1	20	76.8	1.74	25.3666	1	SHGr	R	R	R	233	217	7.11111	233	233	0	250	217	14.1328	117	100	15.6682	117	83	34	117	100	15.6682	50.2146	46.0829	8.58099	50.2146	35.6223	34	46.8	46.0829	1.54399	108	102	5.71429	111	114	-2.66667	127	130	-2.33463	82	78	5
6	1	21	80.3	1.795	24.9222	2	SHGr	R	R	R	250	267	-6.5764	233	267	-13.6	200	267	-28.6938	117	117	0	117	117	0	83	83	0	46.8	43.8202	6.5764	50.2146	43.8202	13.6	41.5	31.0861	28.6938	117	130	-10.5263	112	125	-10.9705	125	148	-16.8498	87	72	18.8679
7	1	18	66.6	1.73	22.2527	1	SHGr	R	R	R	217	250	-14.1328	250	217	14.1328	200	233	-15.2425	117	117	0	100	100	0	67	100	-39.521	53.9171	46.8	14.1328	40	46.0829	-14.1328	33.5	42.9185	-24.6497	115	126	-9.12863	116	108	7.14286	115	128	-10.6996	100	96	4.08163
8	1	20	83.2	1.739	27.5121	2	SHGr	R	R	R	267	200	28.6938	250	233	7.03934	267	250	6.5764	117	67	54.3478	117	100	15.6682	117	117	0	43.8202	33.5	26.6948	46.8	42.9185	8.65272	43.8202	46.8	-6.5764	126	112	11.7647	139	120	14.6718	140	134	4.37956	96	90	6.45161
9	1	20	96.5	1.77	30.7	1	SHGr	R	R	A	267	283	-5.81818	267	217	20.6612	267	267	0	100	100	0	117	83	34	83	67	21.3333	37.4532	35.3357	5.81818	43.8202	38.2488	13.5773	31.0861	25.0936	21.3333	134	140	-4.37956	142	141	0.706714	139	136	2.18182	114	124	-8.40336
10	1	23	68.4	1.76	22.0816	2	SHGr	M	R	M	167	217	-26.0417	200	183	8.87728	200	167	17.9837	67	83	-21.3333	100	50	66.6667	100	67	39.521	40.1198	38.2488	4.77465	50	27.3224	58.6572	50	40.1198	21.9269	102	105	-2.89855	132	113	15.5102	127	119	6.50407	84	80	4.87805
11	1	21	82.5	1.77	26.3334	1	SHGr	R	R	R	217	250	-14.1328	250	200	22.2222	217	233	-7.11111	100	117	-15.6682	117	100	15.6682	100	100	0	46.0829	46.8	-1.54399	46.8	50	-6.61157	46.0829	42.9185	7.11111	137	140	-2.16606	142	108	27.2	139	128	8.2397	102	93	9.23077
12	2	21	60	1.6	23.53	1	SHGr	R	R	R	233	233	0	233	200	15.2425	233	217	7.11111	117	117	0	100	100	0	117	100	15.6682	50.2146	50.2146	0	42.9185	50	-15.2425	50.2146	46.0829	8.58099	110	107	2.76498	108	102	5.71429	115	104	10.0457	89	84	5.78035
[truncated: 51 more columns]
