# Supplementary material for: Plantar support adaptations in healthy subjects after eight weeks of barefoot running training
Source: PeerJ. 2020 Mar 31;8:e8862. doi: 10.7717/peerj.8862 (PMC7120041; doi:10.7717/peerj.8862)
Supplement: Supplemental Information 2 [file peerj-08-8862-s002.xlsx]

## Sheet: Hoja1
	SEX
1	MALE
2	FEMALE
	DOMINANCE
1	RIGHT
2	LEFT
	PLANTAR SUPPORT PATTERN
R	Hindfoot
M	Midfoot
A	Forefoot
